# Supplementary material for: Co3O4-Based Materials as Potential Catalysts for Methane Detection in Catalytic Gas Sensors
Source: MDPI journal article supplement (doi:10.3390/s24082599), 2024-04-18
Supplement: s1 [file s1]

# Supplementary Materials

## Co<sub>3</sub>O<sub>4</sub>-based materials as potential catalysts for methane detection in catalytic gas sensors

Olena Yurchenko<sup>1\*</sup>, Patrick Diehle<sup>2</sup>, Frank Altmann<sup>2</sup>, Katrin Schmitt<sup>1,3</sup> and Jürgen Wöllenstein<sup>1,3</sup>

<sup>1</sup> Fraunhofer Institute for Physical Measurement Techniques (IPM), Freiburg 79110, Germany

<sup>2</sup> Fraunhofer Institute for Microstructure of Materials and Systems (IMWS), Halle 06120, Germany

<sup>3</sup> Department of Microsystems Engineering (IMTEK), University of Freiburg, 79110 Freiburg, Germany

\* Correspondence: olena.yurchenko@ipm.fraunhofer.de;

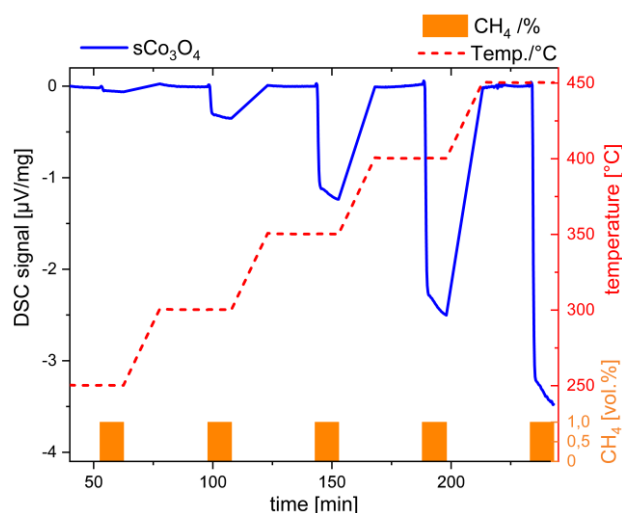

**Figure S1.** DSC signal of sCo<sub>3</sub>O<sub>4</sub> catalyst measured in the temperature range between 250 and 450 °C.
